# Supplementary material
Source: PubMed Central journal article supplement (PMC6486476)
Supplement: mmc1.pdf [file mmc1.pdf]

**Biophysical Journal, Volume 116**

**Supplemental Information**

**Multiple CheY Homologs Control Swimming Reversals and Transient  
Pauses in *Azospirillum brasilense***

**Tanmoy Mukherjee, Mustafa Elmas, Lam Vo, Vasilios Alexiades, Tian Hong, and Gladys  
Alexandre**

**Multiple CheY homologs control swimming reversals and transient pauses in *Azospirillum brasilense***

Tanmoy Mukherjee<sup>1</sup>, Mustafa Elmas<sup>2</sup>, Lam Vo<sup>1</sup>, Vasilios Alexiades<sup>2</sup>, Tian Hong<sup>1,3</sup>, and Gladys Alexandre<sup>1\*</sup>

<sup>1</sup>Biochemistry & Cellular and Molecular Biology department, University of Tennessee, Knoxville 37996

<sup>2</sup>Mathematics department, University of Tennessee, Knoxville 37996

<sup>3</sup>National institute for Mathematical and Biological Synthesis, University of Tennessee, Knoxville 37996

\* To whom correspondence should be addressed

Table S1. List of primers used in this study.

| <b>Primers</b>       | <b>Sequence (5'-3',)</b>         |
|----------------------|----------------------------------|
| 1F                   | ACCATGCGGAAGCAGAAGATCCAGGCC      |
| 1R                   | ATCTCGAAGGACGCGCGTTCG            |
| 2F                   | GATCATCGACTGAGGGACATG            |
| 2R                   | CCGCATGGTGGCGTAGTCATCGACGAC      |
| Inter_CheY7_FwdBamHI | TGTACAGGATCCCGTCGACGACTCCAAGACCA |
| Inter_CheY7_RevBamHI | TGTACAGGATCCGACCGTCCATGCCCGGCATG |

|                   |                                    |
|-------------------|------------------------------------|
| DelY7ChkFwd       | CTGGTCCTTCGCCTATTCGCATC            |
| DelY7ChkRev       | AGCAGAGCAGCGTGACCCAGAG             |
| pKNOCK_SK         | CGCTCTAGAACTAGTGGATC               |
| CheY7KpnI_CompFwd | TAGTCGTGGTACCGTGGCCAAGACCATTCTGAC  |
| CheY7SacI_CompRev | TAGTCGTGAGCTCTTACGGGCAGACCTTCTTCAC |
| CheY6KpnI_CompFwd | TAGTCGTGGTACCATGAAGATCCTTGTCGTCGAT |
| CheY6SacI_CompFwd | TAGTCGTGAGCTCCCCGCCGATGACGGCCTGGAT |

Table S2 Number of tracks of free-swimming strains before and after post-processing.

| <b>Strains</b>      | <b>Before post-processing</b> | <b>After post-processing</b> |
|---------------------|-------------------------------|------------------------------|
| Sp7                 | 1360                          | 1317                         |
| <i>Δche4</i>        | 880                           | 776                          |
| <i>ΔcheA1</i>       | 1034                          | 844                          |
| <i>ΔcheA4</i>       | 1103                          | 1029                         |
| <i>ΔcheA1ΔcheA4</i> | 374                           | 361                          |
| <i>ΔcheY1</i>       | 1104                          | 1098                         |
| <i>ΔcheY4</i>       | 1192                          | 1029                         |
| <i>ΔcheY6</i>       | 840                           | 708                          |
| <i>ΔcheY7</i>       | 1226                          | 1065                         |

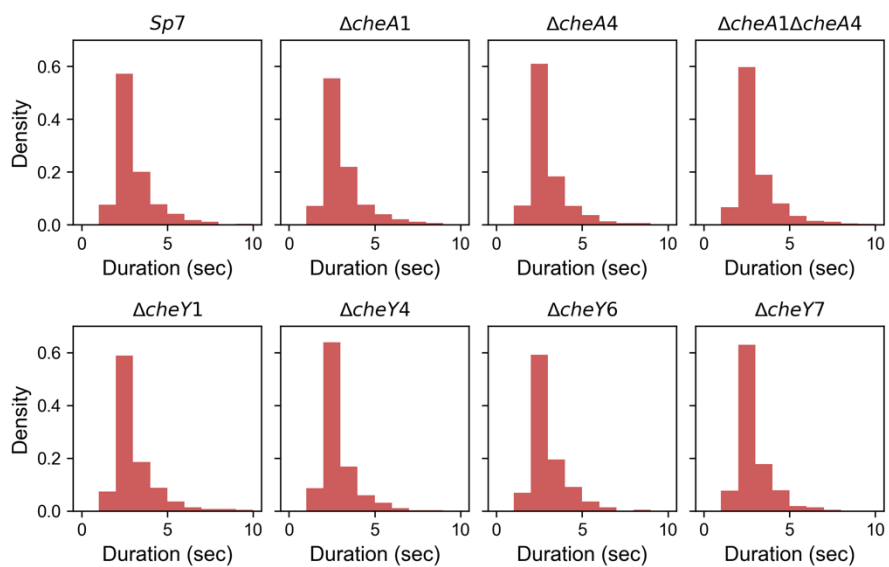

FIGURE S1 Distribution of duration for trajectories used in this study. No significant difference was observed among the strains in terms of the distributions of trajectory durations.

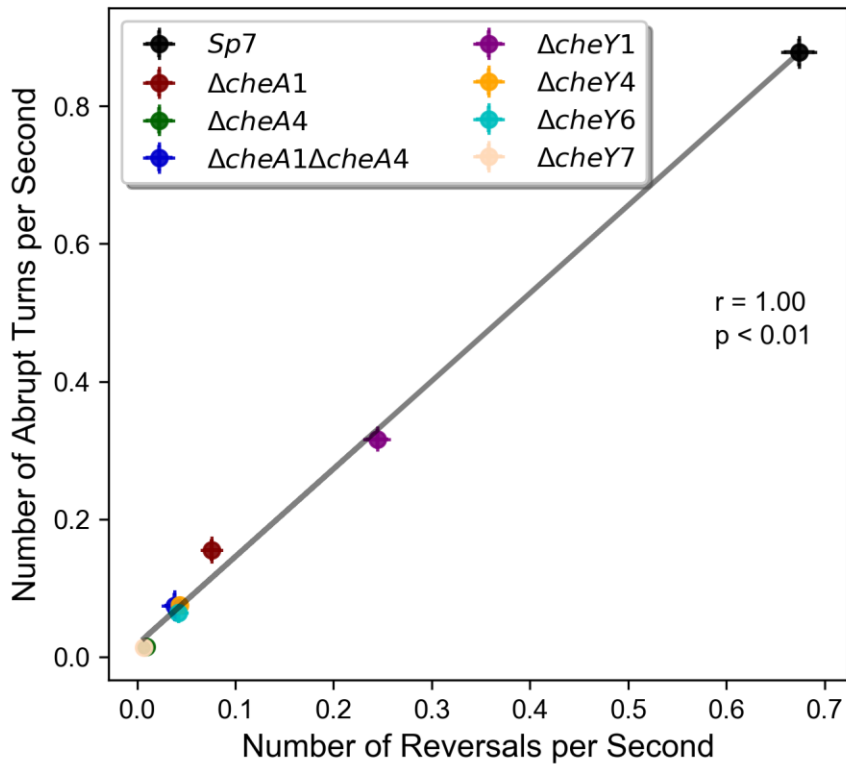

FIGURE S2 - Correlation of abrupt turns per sec vs reversals per sec for all the chemotaxis strains used in this study. A very strong correlation is seen with a Pearson correlation coefficient,  $r$ , of 1 ( $p$ -value  $< 0.01$ ).

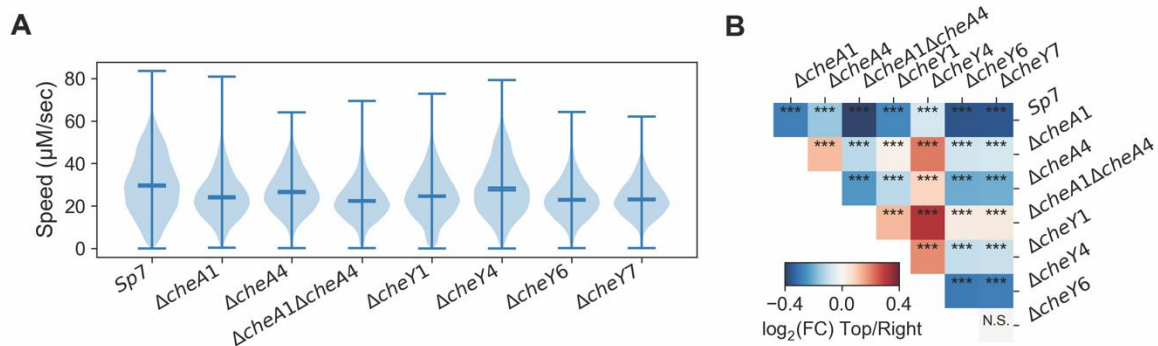

FIGURE S3 A) Distribution of speed of all strains used in this study. The distributions shown here are the instantaneous speeds for all frames of all trajectories in various strains. The top part of the bar is maximum instantaneous speed while the bottom bar is minimum instantaneous speed. The middle bar represents mean. B) Summary matrix of significance among different strains used in this study. Significance of the changes among strains were also tested using pairwise t-test. FC denotes fold change, \*\*\* denotes statistically significant differences at the  $p < 0.001$  level, NS denotes no significance.

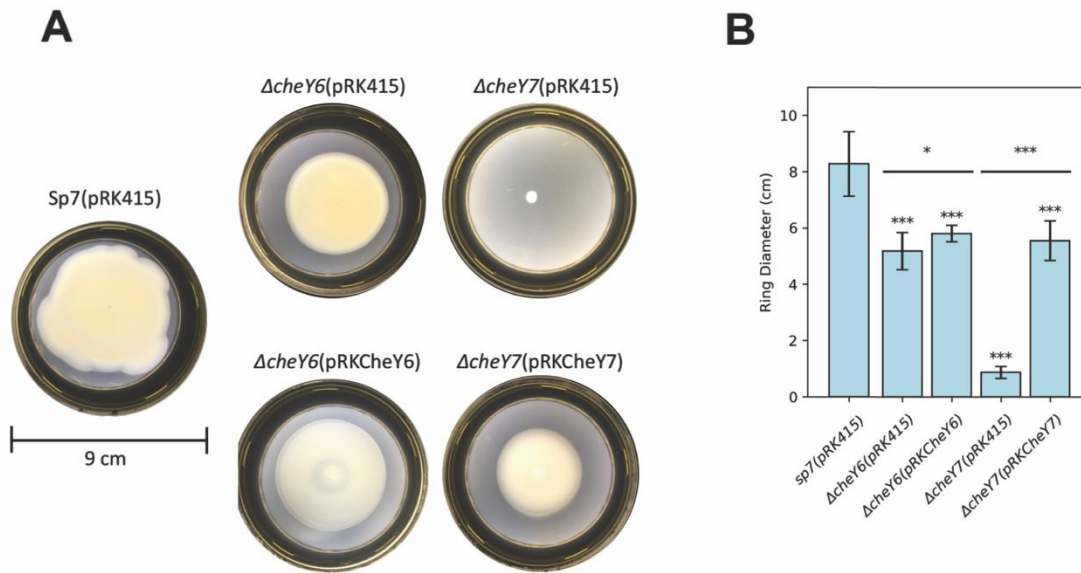

FIGURE S4 Complementation of different CheY homologs. A) Representative image of a swim plate assay done in triplicate. B) Bar graph showing ring diameter for various strains. Pairwise t test was used to test significant difference between strains. \* denotes statistically significant differences at the  $p < 0.05$  level, \*\*\* denotes statistically significant differences at the  $p < 0.001$  level.

### List of Supporting Movies

MOVIE S1: Video of a tethered Sp7 (Wild type) single cell.

MOVIE S2: Video of a tethered  $\Delta cheY4$  single cell

MOVIE S3: Video of a tethered  $\Delta cheY7$  single cell
